# Supplementary material
Source: PubMed Central journal article supplement (PMC4760140)
Supplement: rstb20150210supp1.pdf [file rstb20150210supp1.pdf]

## Reserves as tools for alleviating impacts of marine disease

Joleah B. Lamb, Amelia S. Wenger, Michelle J. Devlin, Daniela M. Ceccarelli, David H. Williamson, and Bette L. Willis

| <b>Contents</b>                                                                            | <b>Page</b> |
|--------------------------------------------------------------------------------------------|-------------|
| <b>Table s1.</b> Permitted and restricted activities in the Marine Park                    | 1           |
| <b>Table s2.</b> Environmental and biological predictor variables used in models           | 2           |
| <b>Table s3.</b> Functional and taxonomic fish species groups                              | 3           |
| <b>Table s4.</b> Mean coral disease prevalence by reserve status and GLMM results          | 9           |
| <b>Table s5.</b> Results of distance-based multivariate linear model – BIC values          | 9           |
| <b>Table s6.</b> Results of distance-based multivariate linear model - explained variation | 10          |
| <b>Table s7.</b> Multiple partial correlations with dbRDA axes                             | 10          |
| <b>Table s8.</b> Pairwise comparison tests                                                 | 11          |

**Table s1.** Permitted and restricted activities in two management zones surveyed in this study. Additional information available from [www.gbrmpa.gov.au](http://www.gbrmpa.gov.au)

| Activity                                                | Marine National Park (Reserves) | Habitat Protection (Non-reserves) |
|---------------------------------------------------------|---------------------------------|-----------------------------------|
| Line fishing                                            | No                              | Yes                               |
| Boating, diving, photography                            | Yes                             | Yes                               |
| Crabbing (trapping)                                     | No                              | Yes                               |
| Harvest fishing for aquarium fish, coral and beachworm  | No                              | Permit                            |
| Harvest fishing for sea cucumber, trochus, rock lobster | No                              | Permit                            |
| Limited collecting                                      | No                              | Yes                               |
| Limited impact research (non-extractive)                | Yes                             | Yes                               |
| Limited spearfishing (snorkel only)                     | No                              | Yes                               |
| Bait netting                                            | No                              | Yes                               |
| Netting (other than bait netting)                       | No                              | Yes                               |
| Research (other than non-extractive)                    | Permit                          | Permit                            |
| Shipping (other than a designated shipping area)        | Permit                          | Permit                            |
| Tourism program                                         | Permit                          | Permit                            |
| Traditional use of marine resources                     | Permit                          | Permit                            |
| Trawling                                                | No                              | No                                |
| Trolling                                                | No                              | Yes <sup>a</sup>                  |

<sup>a</sup> No more than three lines per person and up to six hooks combined total per person

**Table S2.** Predictor variables, codes and units included in the linear distance-based multiple regression model.

| Variable                                | Description and units                                                     | Palms |        | Keppels |       |
|-----------------------------------------|---------------------------------------------------------------------------|-------|--------|---------|-------|
|                                         |                                                                           | Min   | Max    | Min     | Max   |
| <b>Environmental predictors</b>         |                                                                           |       |        |         |       |
| Temperature                             | °C                                                                        | 28    | 31     | 20      | 22    |
| Depth                                   | m                                                                         | 6     | 9      | 3       | 10    |
| Distance from river mouth               | km                                                                        | 19.3  | 33.8   | 27.3    | 40.4  |
| Primary water exposure <sup>K</sup>     | Exposure to primary water                                                 | 0     | 0      | 2       | 4     |
| Secondary water exposure <sup>K</sup>   | Exposure to secondary water                                               | 0     | 0      | 14      | 18    |
| Primary water exposure z-score          | Difference in primary water exposure from long-term average (2006-2013)   | 0     | 0      | 0.02    | 1.1   |
| Secondary water exposure z-score        | Difference in secondary water exposure from long-term average (2006-2013) | 0     | 0      | -1.3    | 1.2   |
| <b>Biological predictors</b>            |                                                                           |       |        |         |       |
| Fish abundance <sup>K,P</sup>           | number per 200 m <sup>2</sup>                                             | 125   | 377    | 30.8    | 453.4 |
| Fish species diversity                  | Shannon-Weiner diversity (H')                                             | 2.3   | 3.1    | 0.7     | 2.5   |
| Fish functional groups                  | Number of functional groups represented                                   | 9     | 12     | 7       | 11    |
| Detritivores <sup>*</sup>               | Number per 200 m <sup>2</sup>                                             | 0     | 9      | 0       | 8.7   |
| Algal croppers <sup>*</sup>             | Number per 200 m <sup>2</sup>                                             | 0     | 47     | 0       | 6.7   |
| Corallivores <sup>*</sup>               | Number per 200 m <sup>2</sup>                                             | 0     | 25     | 0       | 32.7  |
| Benthic carnivores <sup>*P</sup>        | Number per 200 m <sup>2</sup>                                             | 3.7   | 32.7   | 58.7    | 219.3 |
| Intermediate predators <sup>*</sup>     | Number per 200 m <sup>2</sup>                                             | 12.3  | 125.7  | 0.7     | 170.6 |
| Large predators <sup>*</sup>            | Number per 200 m <sup>2</sup>                                             | 1.3   | 9.7    | 0.7     | 15.3  |
| Omnivorous pomacentrids <sup>*P</sup>   | Number per 200 m <sup>2</sup>                                             | 8.3   | 222    | 4.4     | 29.6  |
| Planktivorous pomacentrids <sup>*</sup> | Number per 200 m <sup>2</sup>                                             | 0     | 33.7   | 0       | 394   |
| Territorial pomacentrids <sup>*</sup>   | Number per 200 m <sup>2</sup>                                             | 6     | 90.7   | 6.2     | 421.4 |
| Excavating scarids <sup>*</sup>         | Number per 200 m <sup>2</sup>                                             | 0     | 6.5    | 0       | 5.9   |
| Scraping scarids <sup>*</sup>           | Number per 200 m <sup>2</sup>                                             | 2     | 108.7  | 1.3     | 31.3  |
| <b>Benthic predictors</b>               |                                                                           |       |        |         |       |
| Coral genera diversity <sup>K</sup>     | Shannon-Weiner diversity (H')                                             | 0     | 2.1    | 0.01    | 1.6   |
| Coral genera richness                   | Margalef richness index (d)                                               | 0     | 2.2    | 0.05    | 1.1   |
| Coral cover                             | %                                                                         | 3.5   | 37.4   | 6.4     | 82.9  |
| Coral density <sup>K,P</sup>            | Number per 30m <sup>2</sup>                                               | 18.3  | 1259.3 | 42      | 688   |
| <i>Acropora</i> cover <sup>K</sup>      | %                                                                         | 0     | 5.2    | 0       | 82.8  |
| Coral bleaching                         | % colonies affected                                                       | 0     | 9.6    | 0       | 6.2   |
| Coral physical injury                   | % colonies affected                                                       | 0     | 8.9    | 0       | 9.6   |
| Coral sediment necrosis                 | % colonies affected                                                       | 0     | 5.8    | 0       | 6.2   |
| Coral predation scars                   | % colonies affected                                                       | 0     | 1.5    | 0       | 18.2  |
| Site complexity index                   | Index combining slope and rugosity                                        | 3.8   | 10.8   | 2.9     | 7.9   |
| Fishing line                            | Number per 30 m <sup>2</sup>                                              | 0     | 8      | 0       | 4     |
| Macroalgae cover                        | %                                                                         | 0     | 12.4   | 0       | 38.6  |

\* See Table s3 for reef fish species placed in each functional group.

<sup>K</sup> Variable excluded from final model due to collinearity set at  $|r| > 0.8$  for the Keppel Island region.

<sup>P</sup> Variable excluded from final model due to collinearity set at  $|r| > 0.8$  for the Palm Island region.

**Table s3.** Fish species categorised into functional and taxonomic groups according to targeted fishery status in the Great Barrier Reef Marine Park.

| Family                      | Species                         | Functional Group  | Fishery status |
|-----------------------------|---------------------------------|-------------------|----------------|
| <b>Acanthuridae</b>         | <i>Acanthurus blochii</i>       | Detritivore       | Non-target     |
|                             | <i>Acanthurus dussumieri</i>    | Detritivore       | Non-target     |
|                             | <i>Acanthurus grammoptilus</i>  | Detritivore       | Non-target     |
|                             | <i>Acanthurus lineatus</i>      | Algal cropper     | Non-target     |
|                             | <i>Acanthurus nigricauda</i>    | Detritivore       | Non-target     |
|                             | <i>Acanthurus nigrofuscus</i>   | Algal cropper     | Non-target     |
|                             | <i>Acanthurus xanthopterus</i>  | Detritivore       | Non-target     |
|                             | <i>Ctenochaetus binotatus</i>   | Detritivore       | Non-target     |
|                             | <i>Ctenochaetus striatus</i>    | Detritivore       | Non-target     |
|                             | <i>Naso annulatus</i>           | Algal cropper     | Non-target     |
|                             | <i>Naso brevirostris</i>        | Algal cropper     | Non-target     |
|                             | <i>Naso lituratus</i>           | Algal cropper     | Non-target     |
|                             | <i>Naso tuberosus</i>           | Algal cropper     | Non-target     |
|                             | <i>Naso unicornis</i>           | Algal cropper     | Non-target     |
|                             | <i>Prionurus microlepidotus</i> | Algal cropper     | Non-target     |
|                             | <i>Zebrasoma scopas</i>         | Algal cropper     | Non-target     |
| <i>Zebrasoma veliferum</i>  | Algal cropper                   | Non-target        |                |
| <b>Chaetodontidae</b>       | <i>Chaetodon aureofasciatus</i> | Corallivore       | Non-target     |
|                             | <i>Chaetodon auriga</i>         | Corallivore       | Non-target     |
|                             | <i>Chaetodon baronessa</i>      | Corallivore       | Non-target     |
|                             | <i>Chaetodon citrinellus</i>    | Corallivore       | Non-target     |
|                             | <i>Chaetodon flavirostris</i>   | Corallivore       | Non-target     |
|                             | <i>Chaetodon lineolatus</i>     | Corallivore       | Non-target     |
|                             | <i>Chaetodon lunula</i>         | Corallivore       | Non-target     |
|                             | <i>Chaetodon lunulatus</i>      | Benthic carnivore | Non-target     |
|                             | <i>Chaetodon melannotus</i>     | Benthic carnivore | Non-target     |
|                             | <i>Chaetodon ornatissimus</i>   | Corallivore       | Non-target     |
|                             | <i>Chaetodon plebeius</i>       | Corallivore       | Non-target     |
|                             | <i>Chaetodon rafflesi</i>       | Corallivore       | Non-target     |
|                             | <i>Chaetodon rainfordi</i>      | Corallivore       | Non-target     |
|                             | <i>Chaetodon speculum</i>       | Corallivore       | Non-target     |
|                             | <i>Chaetodon trifascialis</i>   | Corallivore       | Non-target     |
|                             | <i>Chaetodon ulietensis</i>     | Benthic carnivore | Non-target     |
|                             | <i>Chaetodon vagabundus</i>     | Corallivore       | Non-target     |
|                             | <i>Chelmon rostratus</i>        | Benthic carnivore | Non-target     |
|                             | <i>Coradion altivelis</i>       | Benthic carnivore | Non-target     |
|                             | <i>Coradion chrysostomus</i>    | Benthic carnivore | Non-target     |
| <i>Heniochus acuminatus</i> | Benthic carnivore               | Non-target        |                |

|                   |                                      |                   |                  |
|-------------------|--------------------------------------|-------------------|------------------|
|                   | <i>Heniochus monoceros</i>           | Benthic carnivore | Non-target       |
|                   | <i>Heniochus varius</i>              | Benthic carnivore | Non-target       |
|                   | <i>Parachaetodon ocellatus</i>       | Benthic carnivore | Non-target       |
| <b>Ephippidae</b> | <i>Platax orbicularis</i>            | Benthic carnivore | Non-target       |
|                   | <i>Platax teira</i>                  | Benthic carnivore | Non-target       |
|                   | <i>Platax pinnatus</i>               | Benthic carnivore | Non-target       |
|                   | <i>Platax teira</i>                  | Benthic carnivore | Non-target       |
| <b>Haemulidae</b> | <i>Diagramma pictum</i>              | Large predator    | Secondary Target |
|                   | <i>Plectorhinchus</i>                | Large predator    | Secondary Target |
|                   | <i>Plectorhinchus flavomaculatus</i> | Large predator    | Secondary Target |
|                   | <i>Plectorhinchus gibbosus</i>       | Large predator    | Secondary Target |
|                   | <i>Plectorhinchus lessonii</i>       | Large predator    | Secondary Target |
|                   | <i>Plectorhinchus unicolor</i>       | Large predator    | Secondary Target |
| <b>Kyphosidae</b> | <i>Kyphosus spp.</i>                 | Algal cropper     | Non-target       |
|                   | <i>Microcanthus strigatus</i>        | Benthic carnivore | Non-target       |
| <b>Labridae</b>   | <i>Anampses geographicus</i>         | Benthic carnivore | Non-target       |
|                   | <i>Anampses neoguinaicus</i>         | Benthic carnivore | Non-target       |
|                   | <i>Bodianus axillaris</i>            | Benthic carnivore | Non-target       |
|                   | <i>Bodianus loxozonus</i>            | Benthic carnivore | Non-target       |
|                   | <i>Bodianus mesothorax</i>           | Benthic carnivore | Non-target       |
|                   | <i>Cheilinus chlorurus</i>           | Benthic carnivore | Non-target       |
|                   | <i>Cheilinus fasciatus</i>           | Benthic carnivore | Non-target       |
|                   | <i>Cheilinus trilobatus</i>          | Benthic carnivore | Non-target       |
|                   | <i>Cheilinus undulatus</i>           | Benthic carnivore | Non-target       |
|                   | <i>Choerodon anchorago</i>           | Benthic carnivore | Secondary target |
|                   | <i>Choerodon cyanodus</i>            | Benthic carnivore | Secondary target |
|                   | <i>Choerodon fasciatus</i>           | Benthic carnivore | Non-target       |
|                   | <i>Choerodon graphicus</i>           | Benthic carnivore | Secondary target |
|                   | <i>Choerodon monostigma</i>          | Benthic carnivore | Secondary target |
|                   | <i>Choerodon schoenleinii</i>        | Benthic carnivore | Secondary target |
|                   | <i>Choerodon vitta</i>               | Benthic carnivore | Non-target       |
|                   | <i>Epibulus insidiator</i>           | Benthic carnivore | Non-target       |
|                   | <i>Gomphosus varius</i>              | Benthic carnivore | Non-target       |
|                   | <i>Halichoeres melanurus</i>         | Benthic carnivore | Non-target       |
|                   | <i>Hemigymnus fasciatus</i>          | Benthic carnivore | Non-target       |
|                   | <i>Hemigymnus melapterus</i>         | Benthic carnivore | Non-target       |
|                   | <i>Labrichthys unilineatus</i>       | Benthic carnivore | Non-target       |
|                   | <i>Labroides bicolor</i>             | Benthic carnivore | Non-target       |
|                   | <i>Labroides dimidiatus</i>          | Benthic carnivore | Non-target       |
|                   | <i>Labropsis australis</i>           | Benthic carnivore | Non-target       |

|                    |                                  |                       |                  |
|--------------------|----------------------------------|-----------------------|------------------|
|                    | <i>Oxycheilinus diagramma</i>    | Benthic carnivore     | Non-target       |
|                    | <i>Psuedolabrus guentheri</i>    | Benthic carnivore     | Non-target       |
|                    | <i>Stethojulis bandanensis</i>   | Benthic carnivore     | Non-target       |
|                    | <i>Stethojulis strigiventer</i>  | Benthic carnivore     | Non-target       |
|                    | <i>Thalassoma hardwicke</i>      | Benthic carnivore     | Non-target       |
|                    | <i>Thalassoma janseni</i>        | Benthic carnivore     | Non-target       |
|                    | <i>Thalassoma lunare</i>         | Benthic carnivore     | Non-target       |
|                    | <i>Thalassoma lutescens</i>      | Benthic carnivore     | Non-target       |
| <b>Lethrinidae</b> | <i>Gymnocranius spp.</i>         | Intermediate predator | Secondary target |
|                    | <i>Lethrinus atkinsoni</i>       | Intermediate predator | Secondary target |
|                    | <i>Lethrinus laticaudis</i>      | Intermediate predator | Secondary target |
|                    | <i>Lethrinus lentjan</i>         | Intermediate predator | Secondary target |
|                    | <i>Lethrinus miniatus</i>        | Intermediate predator | Primary target   |
|                    | <i>Lethrinus nebulosus</i>       | Intermediate predator | Secondary target |
|                    | <i>Lethrinus obsoletus</i>       | Intermediate predator | Secondary target |
|                    | <i>Lethrinus ornatus</i>         | Intermediate predator | Secondary target |
|                    | <i>Monotaxis grandoculis.</i>    | Intermediate predator | Secondary target |
| <b>Lutjanidae</b>  | <i>Lutjanus argentimaculatus</i> | Large predator        | Secondary target |
|                    | <i>Lutjanus carponotatus</i>     | Intermediate predator | Secondary target |
|                    | <i>Lutjanus fulviflamma</i>      | Intermediate predator | Secondary target |
|                    | <i>Lutjanus fulvus</i>           | Intermediate predator | Secondary target |
|                    | <i>Lutjanus lemniscatus</i>      | Intermediate predator | Secondary target |
|                    | <i>Lutjanus lutjanus</i>         | Intermediate predator | Secondary target |
|                    | <i>Lutjanus monostigma</i>       | Intermediate predator | Secondary target |
|                    | <i>Lutjanus quinquelineatus</i>  | Intermediate predator | Secondary target |
|                    | <i>Lutjanus russelli</i>         | Intermediate predator | Secondary target |
|                    | <i>Lutjanus sebae</i>            | Intermediate predator | Primary target   |
|                    | <i>Lutjanus vitta</i>            | Intermediate predator | Secondary target |
|                    | <i>Symphorus nematophorus</i>    | Large predator        | Non-target       |
| <b>Mullidae</b>    | <i>Parupeneus barberinus</i>     | Benthic carnivore     | Non-target       |
|                    | <i>Parupeneus bifasciatus</i>    | Benthic carnivore     | Non-target       |
|                    | <i>Parupeneus ciliatus</i>       | Benthic carnivore     | Non-target       |
|                    | <i>Parupeneus indicus</i>        | Benthic carnivore     | Non-target       |
| <b>Muraenidae</b>  | <i>Echidna nebulosa</i>          | Intermediate predator | Non-target       |
|                    | <i>Gymnothorax favagineus</i>    | Intermediate predator | Non-target       |
|                    | <i>Gymnothorax javanicus</i>     | Intermediate predator | Non-target       |
|                    | <i>Gymnothorax meleagris</i>     | Intermediate predator | Non-target       |
|                    | <i>Gymnothorax undulatus</i>     | Intermediate predator | Non-target       |
|                    | <i>Gymnothorax javanicus</i>     | Intermediate predator | Non-target       |
|                    | <i>Gymnothorax meleagris</i>     | Intermediate predator | Non-target       |

|                              |                                    |                           |            |
|------------------------------|------------------------------------|---------------------------|------------|
| <b>Nemipteridae</b>          | <i>Scolopsis bilineatus</i>        | Intermediate predator     | Non-target |
|                              | <i>Scolopsis margaritifer</i>      | Intermediate predator     | Non-target |
|                              | <i>Scolopsis monogramma</i>        | Intermediate predator     | Non-target |
| <b>Pomacanthidae</b>         | <i>Centropyge bicolor</i>          | Benthic carnivore         | Non-target |
|                              | <i>Centropyge bispinosus</i>       | Benthic carnivore         | Non-target |
|                              | <i>Centropyge nox</i>              | Benthic carnivore         | Non-target |
|                              | <i>Centropyge tibicen</i>          | Benthic carnivore         | Non-target |
|                              | <i>Centropyge vrolikii</i>         | Benthic carnivore         | Non-target |
|                              | <i>Chaetodontoplus douboulayi</i>  | Benthic carnivore         | Non-target |
|                              | <i>Chaetodontoplus meredithi</i>   | Benthic carnivore         | Non-target |
|                              | <i>Pomacanthus imperator</i>       | Benthic carnivore         | Non-target |
|                              | <i>Pomacanthus semicirculatus</i>  | Benthic carnivore         | Non-target |
|                              | <i>Pomacanthus sexstriatus</i>     | Benthic carnivore         | Non-target |
|                              | <i>Pomacanthus xanthometapon</i>   | Benthic carnivore         | Non-target |
| <i>Pygoplites diacanthus</i> | Benthic carnivore                  | Non-target                |            |
| <b>Pomacentridae</b>         | <i>Abudefduf bengalensis</i>       | Omnivorous pomacentrid    | Non-target |
|                              | <i>Abudefduf sexfasciatus</i>      | Omnivorous pomacentrid    | Non-target |
|                              | <i>Abudefduf vaigiensis</i>        | Omnivorous pomacentrid    | Non-target |
|                              | <i>Abudefduf whiteyi</i>           | Omnivorous pomacentrid    | Non-target |
|                              | <i>Abudefduf sexfasciatus</i>      | Omnivorous pomacentrid    | Non-target |
|                              | <i>Abudefduf vaigiensis</i>        | Omnivorous pomacentrid    | Non-target |
|                              | <i>Abudefduf whiteyi</i>           | Omnivorous pomacentrid    | Non-target |
|                              | <i>Acanthochromis polyacanthus</i> | Omnivorous pomacentrid    | Non-target |
|                              | <i>Amblyglyphidodon aureus</i>     | Omnivorous pomacentrid    | Non-target |
|                              | <i>Amblyglyphidodon curacao</i>    | Omnivorous pomacentrid    | Non-target |
|                              | <i>Amblyglyphidodon</i>            | Omnivorous pomacentrid    | Non-target |
|                              | <i>Amphiprion akindynos</i>        | Omnivorous pomacentrid    | Non-target |
|                              | <i>Amphiprion chrysopterus</i>     | Omnivorous pomacentrid    | Non-target |
|                              | <i>Amphiprion clarkia</i>          | Omnivorous pomacentrid    | Non-target |
|                              | <i>Amphiprion melanopus</i>        | Omnivorous pomacentrid    | Non-target |
|                              | <i>Amphiprion perideraion</i>      | Omnivorous pomacentrid    | Non-target |
|                              | <i>Chromis amboinensis</i>         | Planktivorous pomacentrid | Non-target |
|                              | <i>Chromis atripectoralis</i>      | Planktivorous pomacentrid | Non-target |
|                              | <i>Chromis atripes</i>             | Planktivorous pomacentrid | Non-target |
|                              | <i>Chromis nitida</i>              | Planktivorous pomacentrid | Non-target |
|                              | <i>Chromis retrofasciatus</i>      | Planktivorous pomacentrid | Non-target |
|                              | <i>Chromis ternatensis</i>         | Planktivorous pomacentrid | Non-target |
|                              | <i>Chromis weberi</i>              | Planktivorous pomacentrid | Non-target |
|                              | <i>Chrysiptera rex</i>             | Omnivorous pomacentrid    | Non-target |
|                              | <i>Chrysiptera rollandi</i>        | Omnivorous pomacentrid    | Non-target |
|                              | <i>Chrysiptera talboti</i>         | Omnivorous pomacentrid    | Non-target |



|                 |                                    |                           |            |
|-----------------|------------------------------------|---------------------------|------------|
|                 | <i>Dascyllus aruanus</i>           | Omnivorous pomacentrid    | Non-target |
|                 | <i>Dascyllus melanurus</i>         | Omnivorous pomacentrid    | Non-target |
|                 | <i>Dascyllus trimaculatus</i>      | Omnivorous pomacentrid    | Non-target |
|                 | <i>Dascyllus reticulatus</i>       | Omnivorous pomacentrid    | Non-target |
|                 | <i>Dischistodus melanotus</i>      | Territorial pomacentrid   | Non-target |
|                 | <i>Dischistodus perspicillatus</i> | Territorial pomacentrid   | Non-target |
|                 | <i>Dischistodus prosopotaenia</i>  | Territorial pomacentrid   | Non-target |
|                 | <i>Dischistodus</i>                | Territorial pomacentrid   | Non-target |
|                 | <i>Hemiglyphidodon</i>             | Territorial pomacentrid   | Non-target |
|                 | <i>Neoglyphidodon melas</i>        | Territorial pomacentrid   | Non-target |
|                 | <i>Neoglyphidodon nigroris</i>     | Territorial pomacentrid   | Non-target |
|                 | <i>Plectroglyphidodon dickii</i>   | Territorial pomacentrid   | Non-target |
|                 | <i>Plectroglyphidodon</i>          | Territorial pomacentrid   | Non-target |
|                 | <i>Pomacentrus adelus</i>          | Territorial pomacentrid   | Non-target |
|                 | <i>Pomacentrus amboinensis</i>     | Omnivorous pomacentrid    | Non-target |
|                 | <i>Pomacentrus australis</i>       | Omnivorous pomacentrid    | Non-target |
|                 | <i>Pomacentrus bankanensis</i>     | Territorial pomacentrid   | Non-target |
|                 | <i>Pomacentrus brachialis</i>      | Omnivorous pomacentrid    | Non-target |
|                 | <i>Pomacentrus chrysurus</i>       | Territorial pomacentrid   | Non-target |
|                 | <i>Pomacentrus coelestis</i>       | Omnivorous pomacentrid    | Non-target |
|                 | <i>Pomacentrus lepidogenis</i>     | Planktivorous pomacentrid | Non-target |
|                 | <i>Pomacentrus moluccensis</i>     | Omnivorous pomacentrid    | Non-target |
|                 | <i>Pomacentrus nagasakiensis</i>   | Omnivorous pomacentrid    | Non-target |
|                 | <i>Pomacentrus vaiuli</i>          | Territorial pomacentrid   | Non-target |
|                 | <i>Pomacentrus wardi</i>           | Territorial pomacentrid   | Non-target |
|                 | <i>Stegastes apicalis</i>          | Territorial pomacentrid   | Non-target |
|                 | <i>Stegastes fasciolatus</i>       | Territorial pomacentrid   | Non-target |
| <b>Scaridae</b> | <i>Bolbometapon muricatum</i>      | Excavating grazer         | Non-target |
|                 | <i>Cetoscarus bicolor</i>          | Excavating grazer         | Non-target |
|                 | <i>Chlorurus bleekeri</i>          | Excavating grazer         | Non-target |
|                 | <i>Chlorurus microrhinus</i>       | Excavating grazer         | Non-target |
|                 | <i>Chlorurus sordidus</i>          | Excavating grazer         | Non-target |
|                 | <i>Hipposcarus longiceps</i>       | Excavating grazer         | Non-target |
|                 | <i>Scarus altipinnis</i>           | Scraping grazer           | Non-target |
|                 | <i>Scarus chamaeleon</i>           | Scraping grazer           | Non-target |
|                 | <i>Scarus dimidiatus</i>           | Scraping grazer           | Non-target |
|                 | <i>Scarus flavipectoralis</i>      | Scraping grazer           | Non-target |
|                 | <i>Scarus frenatus</i>             | Scraping grazer           | Non-target |
|                 | <i>Scarus ghobban</i>              | Scraping grazer           | Non-target |
|                 | <i>Scarus globiceps</i>            | Scraping grazer           | Non-target |
|                 | <i>Scarus niger</i>                | Scraping grazer           | Non-target |
|                 | <i>Scarus psittacus</i>            | Scraping grazer           | Non-target |
|                 | <i>Scarus rivulatus</i>            | Scraping grazer           | Non-target |

|                   |                                     |                       |                  |
|-------------------|-------------------------------------|-----------------------|------------------|
|                   | <i>Scarus rubroviolaceus</i>        | Scraping grazer       | Non-target       |
|                   | <i>Scarus schlegeli</i>             | Scraping scarid       | Non-target       |
|                   | <i>Scarus spinus</i>                | Scraping grazer       | Non-target       |
|                   | <i>Scarus tricolor</i>              | Scraping grazer       | Non-target       |
| <b>Serranidae</b> | <i>Aethaloperca rogga</i>           | Intermediate predator | Secondary target |
|                   | <i>Anyperodon leucogrammicus</i>    | Large predator        | Secondary target |
|                   | <i>Cephalopholis boenak</i>         | Intermediate predator | Non-target       |
|                   | <i>Cephalopholis cyanostigma</i>    | Intermediate predator | Secondary target |
|                   | <i>Cephalopholis microprion</i>     | Intermediate predator | Non-target       |
|                   | <i>Cromileptes altivelis</i>        | Large predator        | Primary target   |
|                   | <i>Diploprion bifasciatus</i>       | Intermediate predator | Non-target       |
|                   | <i>Epinephelus caerulopunctatus</i> | Large predator        | Secondary target |
|                   | <i>Epinephelus fasciatus</i>        | Intermediate predator | Secondary target |
|                   | <i>Epinephelus fuscoguttatus</i>    | Large predator        | Secondary target |
|                   | <i>Epinephelus lanceolatus</i>      | Large predator        | Non-target       |
|                   | <i>Epinephelus merra</i>            | Intermediate predator | Secondary target |
|                   | <i>Epinephelus ongus</i>            | Intermediate predator | Secondary target |
|                   | <i>Epinephelus quoyanus</i>         | Intermediate predator | Secondary target |
|                   | <i>Plectropomus laevis</i>          | Large predator        | Primary target   |
|                   | <i>Plectropomus leopardus</i>       | Large predator        | Primary target   |
|                   | <i>Plectropomus maculatus</i>       | Large predator        | Primary target   |
| <b>Siganidae</b>  | <i>Siganus argenteus</i>            | Algal cropper         | Non-target       |
|                   | <i>Siganus corallinus</i>           | Algal cropper         | Non-target       |
|                   | <i>Siganus doliatus</i>             | Algal cropper         | Non-target       |
|                   | <i>Siganus fuscescens</i>           | Algal cropper         | Non-target       |
|                   | <i>Siganus javus</i>                | Algal cropper         | Non-target       |
|                   | <i>Siganus lineatus</i>             | Algal cropper         | Non-target       |
|                   | <i>Siganus puellus</i>              | Algal cropper         | Non-target       |
|                   | <i>Siganus punctatus</i>            | Algal cropper         | Non-target       |
|                   | <i>Siganus spinus</i>               | Algal cropper         | Non-target       |
|                   | <i>Siganus vulpinus</i>             | Algal cropper         | Non-target       |
| <b>Zanclidae</b>  | <i>Zanclus cornutus</i>             | Benthic carnivore     | Non-target       |



**Table s4.** Mean prevalence<sup>a</sup> of coral disease and results (z-values) of generalized linear mixed-effects models (GLMM) comparing disease prevalence between reserves and non-reserves.

| Region  | Variable                      | Reserve              | Non-Reserve          | GLMM           |
|---------|-------------------------------|----------------------|----------------------|----------------|
|         |                               | Mean ± SE prevalence | Mean ± SE prevalence | Reserve status |
| Palms   | <b>Total disease</b>          | 0.98 ± 0.29          | 7.35 ± 0.94          | -878.5(***)    |
|         | Skeletal eroding band         | 0.59 ± 0.26          | 3.47 ± 0.79          | -8.3(***)      |
|         | Brown band                    | 0.07 ± 0.04          | 0.52 ± 0.17          | -4.2(***)      |
|         | Black band                    | 0.36 ± 0.15          | 1.61 ± 0.27          | -4.5(***)      |
|         | White syndrome                | 0.13 ± 0.05          | 1.40 ± 0.47          | -4.2(***)      |
|         | Growth anomalies              | 0.06 ± 0.06          | 0.10 ± 0.05          | -1.3(ns)       |
|         | Atramentous necrosis          | 0                    | 0                    | -              |
| Keppels | <b>Total disease</b>          | 1.41 ± 0.43          | 3.37 ± 0.86          | -2.3(*)        |
|         | Skeletal eroding band         | 0.35 ± 0.18          | 0.83 ± 0.10          | -1.4(ns)       |
|         | Brown band                    | 0.55 ± 0.06          | 0.92 ± 0.17          | -0.4(ns)       |
|         | Black band                    | 0                    | 0                    | -              |
|         | White syndrome                | 0.51 ± 0.18          | 1.58 ± 0.27          | 0.4(**)        |
|         | Growth anomalies <sup>b</sup> | 0                    | 0.04 ± 0.03          |                |
|         | Atramentous necrosis          | 0                    | 0                    | -              |

<sup>a</sup> Mean prevalence calculated as the percentage of colonies with disease for each disease type or as a percentage of the total number of diseased corals per transect. Analyses performed on binomial data. \*\*\*:  $P < 0.001$ ; \*\*:  $P < 0.01$ ; \*:  $P < 0.05$ ; ns: not significant

<sup>b</sup> Only two cases of disease recorded, model could not be performed.

**Table s5.** Results of stepwise parameter selection using Bayesian Information Criteria (BIC).

| Region  | Variable                 | BIC     | Pseudo-F | P      | Cumulative R <sup>2</sup> | Residual df |
|---------|--------------------------|---------|----------|--------|---------------------------|-------------|
| Palms   | Coral physical damage    | 10.873  | 9.8575   | 0.0004 | 0.29115                   | 24          |
|         | Fishing line             | 10.571  | 3.3745   | 0.0183 | 0.38184                   | 23          |
|         | Macroalgae               | 10.361  | 3.1392   | 0.0255 | 0.45903                   | 22          |
| Keppels | Fishing line             | -5.6626 | 10.040   | 0.0006 | 0.34573                   | 19          |
|         | Fish Functional Groups   | -7.0655 | 4.2458   | 0.0102 | 0.47060                   | 18          |
|         | Secondary water exposure | -7.7571 | 3.3102   | 0.0272 | 0.55689                   | 17          |

**Table s6.** Results of distance-based multivariate linear model for coral disease prevalence showing the proportion of variation explained by environmental and biological variables.

| Region  | Axis                     | Percentage variation explained by individual axes |            |                                              |            |
|---------|--------------------------|---------------------------------------------------|------------|----------------------------------------------|------------|
|         |                          | % explained variation out of fitted model         |            | % explained variation out of total variation |            |
|         |                          | Individual                                        | Cumulative | Individual                                   | Cumulative |
| Palms   | Coral physical damage    | 86.68                                             | 86.68      | 39.79                                        | 39.79      |
|         | Fishing line             | 11.73                                             | 98.41      | 5.39                                         | 45.18      |
|         | Macroalgae               | 1.59                                              | 100        | 0.73                                         | 45.9       |
| Keppels | Fishing line             | 86.24                                             | 86.24      | 48.03                                        | 48.03      |
|         | Fish Functional Groups   | 13.22                                             | 99.46      | 7.36                                         | 55.39      |
|         | Secondary water exposure | 0.54                                              | 100        | 0.3                                          | 55.69      |

**Table s7.** Relationships between dbRDA coordinate axes and orthonormal predictor variables (multiple partial correlations). Results of Welch's two-sample t-tests (t-statistic) and exact Poisson tests (rate ratio) comparing reserve and non-reserve predictor variables.

| Region  | Predictor variable        | RDA1   | RDA2   | Mean ± SE |             | t-statistic | rate ratio |
|---------|---------------------------|--------|--------|-----------|-------------|-------------|------------|
|         |                           |        |        | Reserve   | Non-reserve |             |            |
| Palms   | Coral damage              | -0.902 | 0.395  | 1.1 ± 0.4 | 3.8 ± 0.7   | 3.6 (**)    | -          |
|         | Fishing line <sup>a</sup> | -0.396 | -0.602 | 0.6 ± 0.2 | 1.7 ± 0.7   | -           | 1.5 (*)    |
|         | Macroalgae                | 0.17   | 0.694  | 1.1 ± 0.5 | 1.9 ± 1.0   | 0.6 (ns)    | -          |
| Keppels | Fishing line <sup>a</sup> | -0.756 | -0.149 | 0         | 1.5 ± 0.4   | -           | 3.7 (**)   |
|         | Fish Functional Groups    | -0.563 | -0.35  | 9.0 ± 0.4 | 8.9 ± 0.3   | 0.2 (ns)    | -          |
|         | Secondary water           | -0.335 | 0.925  | 0.7 ± 0.2 | 0.8 ± 0.2   | 0.6 (ns)    | -          |

\*\*\*:  $P < 0.001$ ; \*\*:  $P < 0.01$ ; \*:  $P < 0.05$ ; ns: not significant

**Table s8.** Results of multiple pairwise comparisons of mean white syndrome prevalence using general linear hypothesis tests for sites grouped by protection status (reserve and non-reserve) and exposure to secondary water quality (z-scores) either above or below the long-term average (2006-2013) in the Keppel Island region.

| Pairwise Comparisons |                        |   |             |                        | z-value      |
|----------------------|------------------------|---|-------------|------------------------|--------------|
| Non-Reserve          | Below average exposure | - | Non-Reserve | Above average exposure | -1.170 (ns)  |
| Reserve              | Below average exposure | - | Non-Reserve | Above average exposure | -1.461 (***) |
| Reserve              | Above average exposure | - | Non-Reserve | Above average exposure | -4.723 (ns)  |
| Reserve              | Above average exposure | - | Non-Reserve | Below average exposure | -0.324 (ns)  |
| Reserve              | Below average exposure | - | Non-Reserve | Below average exposure | -3.829 (***) |
| Reserve              | Below average exposure | - | Reserve     | Above average exposure | -3.504 (**)  |

Adjusted P-values reported with Bonferroni correction. Analyses performed on binomial data.

\*\*\*:  $P < 0.001$ ; \*\*:  $P < 0.01$ ; \*:  $P < 0.05$ ; ns: not significant
